# Supplementary material for: A Novel Treatment Modality for Malignant Peripheral Nerve Sheath Tumor Using a Dual-Effect Liposome to Combine Photodynamic Therapy and Chemotherapy
Source: PubMed Central journal article supplement (PMC7238030; doi:10.3390/pharmaceutics12040317), 2020-04-02
Supplement: pharmaceutics-12-00317-s001.pdf [file pharmaceutics-12-00317-s001.pdf]

## Supplementary Materials

A novel treatment modality for malignant peripheral nerve sheath tumor using a dual-effect liposome to combine photodynamic therapy and chemotherapy

**Authors:** Chin-Tin Chen, Po-Chun Peng, Tsuimin Tsai, Hsiung-Fei Chien and Ming-Jen Lee

**Contact:** mjlee@ntu.edu.tw

| Fig. 1  |                    |                                   |                           |                                  |                          |
|---------|--------------------|-----------------------------------|---------------------------|----------------------------------|--------------------------|
|         | Particle size (nm) | cDDP encapsulation efficiency (%) | cDDP loading capacity (%) | Ce6 encapsulation efficiency (%) | Ce6 loading capacity (%) |
| PL-cDDP | 120                | 11.0                              | 1.6                       |                                  |                          |

  

| Fig. 2      |                    |                                   |                           |                                  |                          |
|-------------|--------------------|-----------------------------------|---------------------------|----------------------------------|--------------------------|
|             | Particle size (nm) | cDDP encapsulation efficiency (%) | cDDP loading capacity (%) | Ce6 encapsulation efficiency (%) | Ce6 loading capacity (%) |
| PL-cDDP     | 120                | 11.0                              | 1.6                       |                                  |                          |
| PL-Ce6      | 120                |                                   |                           | 78.0                             | 1.1                      |
| PL-cDDP-Ce6 | 120                | 10.9                              | 1.6                       | 78.7                             | 0.6                      |

  

| Fig. 3          |                    |                                   |                           |                                  |                          |
|-----------------|--------------------|-----------------------------------|---------------------------|----------------------------------|--------------------------|
|                 | Particle size (nm) | cDDP encapsulation efficiency (%) | cDDP loading capacity (%) | Ce6 encapsulation efficiency (%) | Ce6 loading capacity (%) |
| PL-cDDP-Ce6 (A) | 120                | 10.9                              | 1.6                       | 77.5                             | 0.5                      |
| PL-cDDP-Ce6 (B) | 120                | 10.9                              | 1.6                       | 78.7                             | 0.6                      |
| PL-cDDP-Ce6 (C) | 120                | 11.6                              | 1.8                       | 78.2                             | 0.8                      |

  

| Fig. 4      |                    |                                   |                           |                                  |                          |
|-------------|--------------------|-----------------------------------|---------------------------|----------------------------------|--------------------------|
|             | Particle size (nm) | cDDP encapsulation efficiency (%) | cDDP loading capacity (%) | Ce6 encapsulation efficiency (%) | Ce6 loading capacity (%) |
| PL-cDDP     | 120                | 11.0                              | 1.6                       |                                  |                          |
| PL-Ce6      | 120                |                                   |                           | 78.0                             | 1.1                      |
| PL-cDDP-Ce6 | 120                | 11.6                              | 1.8                       | 78.2                             | 0.8                      |

  

| Fig. 5          |                    |                                   |                           |                                  |                          |
|-----------------|--------------------|-----------------------------------|---------------------------|----------------------------------|--------------------------|
|                 | Particle size (nm) | cDDP encapsulation efficiency (%) | cDDP loading capacity (%) | Ce6 encapsulation efficiency (%) | Ce6 loading capacity (%) |
| PL-cDDP-Ce6 (A) | 120                | 15.0                              | 2.1                       | 77.7                             | 2.1                      |
| PL-cDDP-Ce6 (B) | 120                | 12.9                              | 1.8                       | 77.3                             | 1.1                      |
| PL-cDDP-Ce6 (C) | 120                | 10.9                              | 1.6                       | 78.7                             | 0.6                      |

  

| Fig. 6      |                    |                                   |                           |                                  |                          |
|-------------|--------------------|-----------------------------------|---------------------------|----------------------------------|--------------------------|
|             | Particle size (nm) | cDDP encapsulation efficiency (%) | cDDP loading capacity (%) | Ce6 encapsulation efficiency (%) | Ce6 loading capacity (%) |
| PL-cDDP     | 120                | 11.0                              | 1.6                       |                                  |                          |
| PL-Ce6      | 120                |                                   |                           | 78.0                             | 1.1                      |
| PL-cDDP-Ce6 | 120                | 11.6                              | 1.8                       | 78.2                             | 0.8                      |

**Figure S1.** The characteristics of PL-Ce6, PL-cDDP and PL-cDDP-Ce6 used in each figure of this study. Encapsulation efficiency: total entrapped drug/ total drug added; Loading capacity: total entrapped drug/ total liposome weight.

(A)

|            | Particle size (nm) | Dox encapsulation efficiency (%) | Dox loading capacity (%) | Ce6 encapsulation efficiency (%) | Ce6 loading capacity (%) |
|------------|--------------------|----------------------------------|--------------------------|----------------------------------|--------------------------|
| PL-Dox     | 150                | 66.5                             | 12.6                     |                                  |                          |
| PL-Ce6     | 150                |                                  |                          | 49.3                             | 1.7                      |
| PL-Dox-Ce6 | 150                | 35.0                             | 7.3                      | 33.4                             | 1.4                      |

(B)

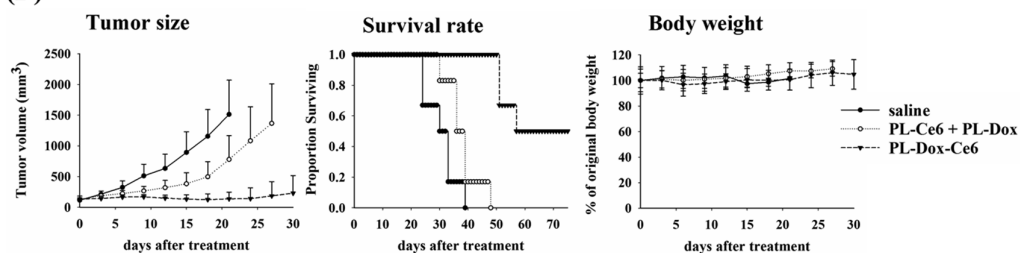

**Figure S2.** (A) The particle size, loading capacity and entrapment efficiency of PL-Ce6, PL-Dox and PL-Dox-Ce6. (B) The therapeutically efficacy of PL-Dox-Ce6 and the combination of PL-Ce6 and PL-Dox on nude mice bearing human S462-TY xenograft tumor. After liposomal drug injection, light irradiation was applied onto the tumor at 2 hr and 12 hr, respectively. The dose of Ce6 and Dox administrated in mice was 1.5 mg/kg and 7 mg/kg, respectively. Left panel, tumor size; Middle panel, survival rate; Right panel, body weight. Data presented are the mean  $\pm$  S.D. for each group (N=6). Complete tumor regression was observed in 3/6 mice treated with PL-Dox-Ce6, resulting in apparent cure with clear superiority over the group treated with the combination of PL-Ce6 and PL-Dox.
